# Supplementary material for: A gapless genome assembly of a Japonica variety ‘BD8’ provides insights into rice salt tolerance
Source: Front Plant Sci. 2025 Dec 12;16:1713117. doi: 10.3389/fpls.2025.1713117 (PMC12741066; doi:10.3389/fpls.2025.1713117)
Supplement: Supplementary file 5 [file Table1.xlsx]

## Sheet: Table S1
Table S1 Reads statistics from Hifi, ONT, Illumina and Hi-C
Data_Type	Clean Data(Gb)	Depth (×)	Reads_num	Reads_base (bp)	Clean Reads_LenN50 (bp)	Clean Reads_LenMean (bp)	Clean Reads_LenMax (bp)
CCS	23.35	51	1498609	23349959413	15846	15581	39142
ONT	20.41	47	210398	20412639395	100253	97019	637123
Illumina	20.54	47.56	68760005	20543984450	-	-	-
Hi-C	45.09	117.33	150680663	45091726690	-	-	-

## Sheet: Table S2
Table S2 BUSCO statistics of BD8
Statistics	Number	Percentage (%)
Complete BUSCOs (c)	1596	98.88
Complete and single-copy BUSCOs (S)	1555	96.34
Complete and duplicated BUSCOs (D)	41	2.54
Fragmented BUSCOs (F)	3	0.19
Missing BUSCOs (M)	15	0.93
Total BUSCO groups searched	1614	100

## Sheet: Table S3
Table S3 Remapping evaluation of Sequencing reads
Sequencing reads	Total_reads	Mapped_reads	Mapped(%)	ave_depth	cov_ratio_1X	cov_ratio_5X	cov_ratio_10X	cov_ratio_20X
Illumina reads	137520010	136675111	99.39	44	99.87	99.77	99.6	98.34
Hifi reads	1498609	1489884	99.42	51	99.99	99.97	99.94	99.42
ONT reads	210398	208715	99.2	47	99.99	99.96	99.94	99.78

## Sheet: Table S4
Table S4 Statistics of Centromics and Telomeres
Chr	Upstream Telomere Start Position (bp)	Upstream Telomere End Position (bp)	Upstream Telomere Length(bp)	Centromics Start Position(bp)	Centromics End Position (bp)	Centromics Length(bp)	Downstream Telomere Start Position (bp)	Downstream Telomere End Position (bp)	Downstream Telomere Length (bp)
Chr01	1	6349	6349	16971625	17921216	949592	44188651	44193892	5242
Chr02	1	7735	7735	13643186	14241982	598797	36645049	36652947	7899
Chr03	1	5790	5790	20320700	20779696	458997	38124645	38129506	4862
Chr04	1	11117	11117	9789658	9909409	119752	35640031	35649257	9227
Chr05	1	7371	7371	12459583	12577869	118287	31241678	31249287	7610
Chr06	1	7275	7275	15777050	16507761	730712	32253284	32262263	8980
Chr07	1	5466	5466	12183191	12408398	225208	29902291	29909817	7527
Chr08	1	8810	8810	12945173	13850284	905112	28350217	28357291	7075
Chr09	-	-	-	2743729	3221475	477747	23754099	23759983	5885
Chr10	1	6984	6984	8337210	8736310	399101	23913060	23913410	351
Chr11	1	7363	7363	13342097	14127054	784958	31680965	31688881	7917
Chr12	1	7071	7071	11358678	11818239	459562	28502089	28507478	5390

## Sheet: Table S5
Table S5 – Statistics of Repeation Sequence.
Classification	Type	Superfamily	Number of elements	Length of sequence (bp)	Percentage of genome sequence (%)
TE Transposable Element	Retroelement	LINE	6890	2327173	0.61
		LTR-Unknown	19892	11814798	3.07
		LTR-Copia	7311	8110432	2.11
		LTR-ERV	1457	110337	0.03
		LTR-Gypsy	25900	43867589	11.42
		LTR-Ngaro	223	16355	0
		LTR-Pao	57	4112	0
		SINE	3702	588430	0.15
	Transposon	ClassII/Academ	1	61	0
		ClassII/CACTA	3017	3011214	0.78
		ClassII/Crypton	10	514	0
		ClassII/Dada	153	8515	0
		ClassII/Ginger	68	4222	0
		ClassII/Helitron	266015	90748560	23.62
		ClassII/IS3EU	44	2397	0
		ClassII/Kolobok	578	82635	0.02
		ClassII/Maverick	25	2842	0
		ClassII/Merlin	347	90245	0.02
		ClassII/Mutator	1720	1529035	0.4
		ClassII/P	76	4779	0
		ClassII/PIF-Harbinger	476	102275	0.03
		ClassII/PiggyBac	59	3177	0
		ClassII/Tc1-Mariner	121	6737	0
		ClassII/Unknown	73791	17392548	4.53
		ClassII/Zisupton	20	1007	0
		ClassII/hAT	1266	275779	0.07
		Unknown	14	728	0
	Total		413234	180106561	46.87
Tandem Repeats		microsatellite(1-9 bp units)	128515	2702650	0.7
		minisatellite(10-99 bp units)	78005	6827378	1.78
		satellite(>=100 bp units)	9230	8663662	2.25
	Total		215750	18193690	4.73

## Sheet: Table S6
Table S6 Gene prediction by Denovo, Homology and RNAseq
Method	Software	Species	Gene number
Ab initio	Augustus	-	25968
	SNAP	-	37623
Homology-based	GeMoMa	O. sativaMSU7	61401
		O. sativaIRGSP-1.0	31862
		O. sativaT2T	61585
		O. sativaZH11	43388
		O. sativa02428	45750
		O. sativaKosh	48381
		O. sativaLemont	46017
		O. sativa9311	44231
		O. sativaR498	48173
RNAseq	GeneMarkS-T	-	19630
	PASA	-	22449
Integration	EVM	-	58685

## Sheet: Table S7
Table S7 Gene feature of BD8 and representative variety
Variety	Gene Number	Gene Total Length (bp)	Average Gene Length (bp)	Exon Length (bp)	Average Exon Length (bp)	Exon Number	Average Exon Number	CDS Length (bp)	Average CDS Length (bp)	CDS Number	Average CDS Number	Intron Length (bp)	Average Intron Length (bp)	Intron Number	Average Intron Number
O. sativaBD8	58685	162177958	2763.53	85454649	1456.16	238502	4.06	74545680	1270.27	232721	3.97	76723309	1307.38	179817	3.06
O. sativaT2T	57359	168391597	2935.75	94299285	1644.02	240582	4.19	77068305	1343.61	231443	4.03	74092312	1291.73	183223	3.19
O. sativaMSU7	55984	165983237	2964.83	91928159	1642.04	239516	4.28	77048719	1376.26	230316	4.11	74055078	1322.79	183532	3.28
O. sativaIRGSP-1.0	28466	115360679	4052.58	56157769	1972.8	153051	5.38	38270394	1344.42	143852	5.05	59202910	2079.78	124585	4.38
O. sativaZH11	37325	127869779	3425.85	60027962	1608.25	172817	4.63	42719385	1144.52	155148	4.16	67841817	1817.6	135492	3.63
O. sativaKosh	40873	132055732	3230.88	63107473	1543.99	179430	4.39	44991249	1100.76	161177	3.94	68948259	1686.89	138557	3.39
O. sativaLemont	39459	131190372	3324.73	61831380	1566.98	179247	4.54	44139268	1118.61	160737	4.07	69358992	1757.75	139788	3.54
O. sativa02428	39104	131720865	3368.48	61737465	1578.8	178922	4.58	43995363	1125.09	160472	4.1	69983400	1789.67	139818	3.58
O. sativaR498	38329	121854569	3179.17	59863404	1561.83	168953	4.41	41704275	1088.06	152494	3.98	61991165	1617.34	130624	3.41
O. sativa9311	38205	116177701	3040.9	55887058	1462.82	174534	4.57	42825588	1120.94	167820	4.39	60290643	1578.08	136329	3.57

## Sheet: Table S8
Table S8 Gene annotation from common anno_database
Anno_Database	Annotated_Number	Annotated_Ratio(%)
GO_Annotation	33028	56.28
KEGG_Annotation	30039	51.19
KOG_Annotation	21172	36.08
Pfam_Annotation	36210	61.7
Swissprot_Annotation	26818	45.7
TrEMBL_Annotation	56244	95.84
eggNOG_Annotation	32753	55.81
nr_Annotation	54821	93.42
All_Annotated	56295	95.93

## Sheet: Table S9
Table S9 Statistics of non-coding RNA
Type	Number	Total_len	Average_Len
rRNA	1294	199629	154.27
tRNA	797	59990	75.27
miRNA	812	223021	274.66
snRNA	136	21358	157.04
snoRNA	160	22608	141.3

## Sheet: Table S10
Table S10 Genome Assemblies for polytree construction
Species	Download
O. sativaR498	http://www.mbkbase.org/R498
O. sativaKosh	Kosh:http://ricerc.sicau.edu.cn/RiceRC/download/downloadBefore
O. brachyantha	https://ftp.ncbi.nlm.nih.gov/genomes/all/GCF/000/231/095/GCF_000231095.2_ObraRS2/
S. bicolor	https://phytozome-next.jgi.doe.gov/info/Sbicolor_v5_1
O. sativaBD8	https://ngdc.cncb.ac.cn/gwh/submit/submission/GWHFWBB00000000.1
O. sativaNip-T2T	http://www.ricesuperpir.com/web/download
O. sativa02428	02428:http://ricerc.sicau.edu.cn/RiceRC/download/downloadBefore
O. sativa9311	http://www.elabcaas.cn/rice/downloads/download_9311_genome.tar.gz
O. rufipogon	https://ngdc.cncb.ac.cn/gwh/Assembly/22887/show
Z. mays	https://data.cyverse.org/dav-anon/iplant/home/laijs/Zm-Mo17-REFERENCE-CAU-2.0/
O. sativaZH11	ZH11:http://ricerc.sicau.edu.cn/RiceRC/download/downloadBefore

[truncated: 6 more sheets: Table S11, Table S12, Table S13, Table S14, Table S15, Table S16]
